# Supplementary material for: Living in the intertidal: desiccation and shading reduce seagrass growth, but high salinity or population of origin have no additional effect
Source: PeerJ. 2018 Jul 20;6:e5234. doi: 10.7717/peerj.5234 (PMC6055680; doi:10.7717/peerj.5234)
Supplement: Supplemental Information 1 [file peerj-06-5234-s001.xlsx]

## Sheet: Morpho Exp1
unit_code	unit code	reservoir	dryfall	light	shoots	WRH	LRH	Llshoot	WLS	LBG	RelRHelongation
C1_0_L1	C11	1	0	L	9	0.75	50	93	0.58	542	900
C1_0_L2	C12	1	0	L	9	1.35	62	153	1.16	1352	785.714
C1_0_L3	C13	1	0	L	8	1.26667	50	105	0.5	752	1150
C1_0_L4	C14	1	0	L	16	1.15	157	178	1.5	1252	1208.33
C2_0_L1	C21	2	0	L	22	2.78571	173	277	1.1	4020	981.25
C2_0_L2	C22	2	0	L	14	1.43571	109	197	1.71	3132	678.571
C2_0_L3	C23	2	0	L	25	2.5325	149	306	1.3	4895	1555.56
C2_0_L4	C24	2	0	L	27	3.8875	167	313	3	9135	659.091
C3_0_L1	C31	3	0	L	14	1.14286	117	132	2.4	1392	457.143
C3_0_L2	C32	3	0	L	12	1.43333	49	134	0.4	814	4800
C3_0_L3	C33	3	0	L	11	0.475	79	107	0.9	578	393.75
C3_0_L4	C34	3	0	L	18	2.79167	98	161	2.7	1700	366.667
C4_0_L1	C41	4	0	L	8	0	44	93	0.54	471	238.462
C4_0_L2	C42	4	0	L	12	1.24286	74	159	1	976	1133.33
C4_0_L3	C43	4	0	L	18	2.11143	113	206	1.8	2706	769.231
C4_0_L4	C44	4	0	L	20	0.72	156	231	1.18	3438	578.261
C5_0_L1	C51	5	0	L	12	1.55667	54	141	1.6	1396	1250
C5_0_L2	C52	5	0	L	10	1.2	122	118	0.6	486	713.333
C5_0_L3	C53	5	0	L	22	2.94	122	292	2.8	4244	916.667
C5_0_L4	C54	5	0	L	15	1.32857	123	206	1.9	2094	412.5
C1_4_L1	C11	1	4	L	18	2.34238	112	258	2.55	5128	918.182
C1_4_L2	C12	1	4	L	9	0.75	51	112	0.7	284	750
C1_4_L3	C13	1	4	L	17	2.35556	162	144	1.4	1638	2214.29
C1_4_L4	C14	1	4	L	11	1.2	40	137	1.1	960	566.667
C2_4_L1	C21	2	4	L	9	0.625	90	103	0.8	185	328.571
C2_4_L2	C22	2	4	L	20	3.05	121	220	2.3	5004	426.087
C2_4_L3	C23	2	4	L	17	1.44	104	212	1.5	3816	1633.33
C2_4_L4	C24	2	4	L	12	1.27857	56	158	1	1160	1300
C3_4_L1	C31	3	4	L	16	2.82857	113	133	2.6	1100	527.778
C3_4_L2	C32	3	4	L	7	1.51667	49	78	0.8	348	444.444
C3_4_L3	C33	3	4	L	13	2.73167	69	136	0.9	886	1625
C3_4_L4	C34	3	4	L	10	1.1	86	124	6.5	766	377.778
C4_4_L1	C41	4	4	L	16	2.09905	109	176	1.6	2652	738.462
C4_4_L2	C42	4	4	L	15	1.21429	99	165	1.4	1347	1550
C4_4_L3	C43	4	4	L	13	1.23714	115	137	1	998	422.727
C4_4_L4	C44	4	4	L	12	1.85357	65	139	0.67	1140	828.571
C5_4_L1	C51	5	4	L	9	1.18571	72	177	1	1182	1100
C5_4_L2	C52	5	4	L	16	1.775	131	238	2.6	1108	385.185
C5_4_L3	C53	5	4	L	7	0.45	57	83	0.6	318	850
C5_4_L4	C54	5	4	L	13	1.41429	92	162	1.1	1878	607.692
C1_6_L1	C11	1	6	L	12	0.475	83	143	1.05	888	1560
C1_6_L2	C12	1	6	L	23	2.35357	142	339	0.9	5000	787.5
C1_6_L3	C13	1	6	L	17	1.88	126	232	1.7	1554	1045.45
C1_6_L4	C14	1	6	L	14	1.51429	67	226	1.3	1586	1016.67
C2_6_L1	C21	2	6	L	15	2.24167	77	219	1.8	2172	2466.67
C2_6_L2	C22	2	6	L	15	2.04286	92	181	1.1	1332	300
C2_6_L3	C23	2	6	L	12	1.45	68	122	1.2	1064	750
C2_6_L4	C24	2	6	L	11	1.16	65	117	1.13	988	828.571
C3_6_L1	C31	3	6	L	18	2.82143	96	258	2.1	2112	540
C3_6_L2	C32	3	6	L	13	1.41429	70	121	1.3	1092	438.462
C3_6_L3	C33	3	6	L	18	1.64857	52	174	1.6	2277	372.727
C3_6_L4	C34	3	6	L	7	1.36	17	67	0.5	398	183.333
C4_6_L1	C41	4	6	L	11	1.55	88	158	1.2	950	528.571
C4_6_L2	C42	4	6	L	13	1.3	45	112	0.9	1104	650
C4_6_L3	C43	4	6	L	12	1.13571	93	163	0.9	900	1450
C4_6_L4	C44	4	6	L	7	0.998333	58	80	0.75	563	480
C5_6_L1	C51	5	6	L	11	1.41667	69	218	1.4	1077	1050
C5_6_L2	C52	5	6	L	10	1.08333	65	159	1	576	712.5
C5_6_L3	C53	5	6	L	16	2.11429	89	182	1.6	1806	535.714
C5_6_L4	C54	5	6	L	6	0.74	26	66	0.7	172	766.667
C1_8_L1	C11	1	8	L	15	1.95714	81	169	1.3	2295	1250
C1_8_L2	C12	1	8	L	13	2.2	56	213	1.3	1866	700
C1_8_L3	C13	1	8	L	20	2.5625	129	195	1.9	4848	1072.73
C1_8_L4	C14	1	8	L	17	2.2	88	205	1.8	1269	319.048
C2_8_L1	C21	2	8	L	15	1.64762	48	160	0.6	1173	336.364
C2_8_L2	C22	2	8	L	10	1.08333	37	143	0.4	638	1133.33
C2_8_L3	C23	2	8	L	19	2.72857	127	195	1.9	2488	388.462
C2_8_L4	C24	2	8	L	16	1.97833	82	228	1.58	2664	645.455
C3_8_L1	C31	3	8	L	14	1.09	81	185	2.5	1380	636.364
C3_8_L2	C32	3	8	L	6	1.13333	20	99	0.9	396	400
C3_8_L3	C33	3	8	L	16	1.15	136	145	0.8	1521	466.667
C3_8_L4	C34	3	8	L	14	1.44167	81	166	1.6	922.8	406.25
C4_8_L1	C41	4	8	L	11	0.5	80	122	1.05	800	1233.33
C4_8_L2	C42	4	8	L	7	0.6	46	71	0.5	189	475
C4_8_L3	C43	4	8	L	18	2.83333	70	251	2.5	3956	775
C4_8_L4	C44	4	8	L	8	0	65	75	0.68	424	828.571
C5_8_L1	C51	5	8	L	7	0.716667	54	90	1.1	185	500
C5_8_L2	C52	5	8	L	15	2.44167	100	192	1.2	1590	614.286
C5_8_L3	C53	5	8	L	12	1.4	59	141	0.9	550	353.846
C5_8_L4	C54	5	8	L	12	0.7	86	150	1.38	1072	473.333
C1_0_S1	C11	1	0	S	13	1.69167	75	177	1.8	1077	581.818
C1_0_S2	C12	1	0	S	7	0.683333	51	94	0.8	283	410
C1_0_S3	C13	1	0	S	10	2.675	61	192	1.3	1134	1120
C1_0_S4	C14	1	0	S	24	3.3725	184	713	3.73	8180	1214.29
C2_0_S1	C21	2	0	S	7	0.533333	37	122	0.5	300	236.364
C2_0_S2	C22	2	0	S	11	1.55	87	244	1.64	1082	443.75
C2_0_S3	C23	2	0	S	21	2.27833	132	299	2.4	2632	500
C2_0_S4	C24	2	0	S	11	1.38	84	169	0.9	866	833.333
C3_0_S1	C31	3	0	S	10	1.46333	60.3	250	1.5	882	503
C3_0_S2	C32	3	0	S	8	0.695714	51	112	0.5	350	537.5
C3_0_S3	C33	3	0	S	8	0.671429	60	95	0.6	426	1400
C3_0_S4	C34	3	0	S	9	0.825	66	124	2.1	486	312.5
C4_0_S1	C41	4	0	S	12	1.125	81	224	1.1	1290	1057.14
C4_0_S2	C42	4	0	S	21	1.79667	189	326	1.2	2809.89	1011.76
C4_0_S3	C43	4	0	S	13	0.52	66	124	1.15	684	407.692
C4_0_S4	C44	4	0	S	18	1.53778	115	186	1.7	1884	447.619
C5_0_S1	C51	5	0	S	15	3.42857	157	193	2.2	2305	423.333
C5_0_S2	C52	5	0	S	13	1.35714	87	164	1.41	1742	625
C5_0_S3	C53	5	0	S	14	1.86667	72	165	2.2	1050	1340
C5_0_S4	C54	5	0	S	11	1.24167	60	160	1.8	840	361.538
C1_4_S1	C11	1	4	S	15	1.72857	120	280	2.08	1617	400
C1_4_S2	C12	1	4	S	11	1.44286	80	213	1.6	770	627.273
C1_4_S3	C13	1	4	S	12	1.83333	89	273	2.3	1284	2866.67
C1_4_S4	C14	1	4	S	15	1.6375	95	221	1.8	1209	533.333
C2_4_S1	C21	2	4	S	12	1.36786	82	204	1.26	1028	583.333
C2_4_S2	C22	2	4	S	14	3.13333	75	126	1.2	1652	733.333
C2_4_S3	C23	2	4	S	10	2.22	58	95	0.8	867	728.571
C2_4_S4	C24	2	4	S	14	1.44286	73	242	1.6	1458	508.333
C3_4_S1	C31	3	4	S	10	1.45	28	148	1.1	404	366.667
C3_4_S2	C32	3	4	S	6	0.74	61	70	0.5	294	454.545
C3_4_S3	C33	3	4	S	9	1.06	37	100	1.3	350	4011.11
C3_4_S4	C34	3	4	S	3	1.31429	98	180	1.35	910	366.667
C4_4_S1	C41	4	4	S	9	1	92	115	0.9	724	922.222
C4_4_S2	C42	4	4	S	10	1	67	157	0.6	942	378.571
C4_4_S3	C43	4	4	S	16	2.11429	90	289	2.1	1482	400
C4_4_S4	C44	4	4	S	17	1.59429	97	300	1.3	1989	592.857
C5_4_S1	C51	5	4	S	22	2.93333	224	354	3.7	2505	1144.44
C5_4_S2	C52	5	4	S	15	2.03214	104	217	1.9	2040	940
C5_4_S3	C53	5	4	S	10	0.966667	57	142	3.5	538	418.182
C5_4_S4	C54	5	4	S	11	0.66	49	73	0.6	294	250
C1_6_S1	C11	1	6	S	12	1.2375	83	232	1.6	936	538.462
C1_6_S2	C12	1	6	S	13	1.50286	97	204	1.56	1032	470.588
C1_6_S3	C13	1	6	S	2	1	14	53	0.6	89	0
C1_6_S4	C14	1	6	S	7	0.5	46	140	0.5	246	475
C2_6_S1	C21	2	6	S	9	1	65	170	1	630	712.5
C2_6_S2	C22	2	6	S	16	0.926	88	193	1.76	1296	388.889
C2_6_S3	C23	2	6	S	19	1.8875	157	430	1.6	3364	1107.69
C2_6_S4	C24	2	6	S	15	2.2	106	236	1.6	990	523.529
C3_6_S1	C31	3	6	S	8	1.16667	52	108	0.9	438	333.333
C3_6_S2	C32	3	6	S	14	2.11833	105	226	2.31	1235.52	452.632
C3_6_S3	C33	3	6	S	16	2.08333	88	276	3.2	2628.4	633.333
C3_6_S4	C34	3	6	S	12	1.1	37	150	0.9	726	428.571
C4_6_S1	C41	4	6	S	12	0.516667	53	169	1.1	892	341.667
C4_6_S2	C42	4	6	S	21	2.91429	80	353	2.4	4764	627.273
C4_6_S3	C43	4	6	S	14	1.32857	78	219	0.9	854	550
C4_6_S4	C44	4	6	S	15	1.94	76	174	1.8	798	442.857
C5_6_S1	C51	5	6	S	12	0.7	112	183	0.9	1022	386.957
C5_6_S2	C52	5	6	S	22	3.17917	117	351	3.1	3684	431.818
C5_6_S3	C53	5	6	S	16	2.24107	108	231	2.12	2112	535.294
C5_6_S4	C54	5	6	S	12	1.31786	99	83	0.8	538	421.053
C1_8_S1	C11	1	8	S	18	2.3445	154	262	2.16	2682	413.333
C1_8_S2	C12	1	8	S	11	0.5	55	173	1	728	511.111
C1_8_S3	C13	1	8	S	18	2.18571	86	295	1.73	2601	616.667
C1_8_S4	C14	1	8	S	12	1.46464	75	221	0.91	1080	581.818
C2_8_S1	C21	2	8	S	16	1.2	73	239	0.7	1080	508.333
C2_8_S2	C22	2	8	S	12	1.41667	39	175	1	1052	254.545
C2_8_S3	C23	2	8	S	17	1.59167	73	270	1.8	2262	1116.67
C2_8_S4	C24	2	8	S	5	0.925	36	42	0.5	191	227.273
C3_8_S1	C31	3	8	S	10	1.55	33	113	1.4	224	450
C3_8_S2	C32	3	8	S	16	2.26667	60	263	2.3	1876	1400
C3_8_S3	C33	3	8	S	11	1.15	63	146	1.3	232	600
C3_8_S4	C34	3	8	S	4	0.8	39	29	0.6	175	875
C4_8_S1	C41	4	8	S	11	1.01667	74	209	1.69	1216	393.333
C4_8_S2	C42	4	8	S	11	0.916667	64	138	1.4	598	276.471
C4_8_S3	C43	4	8	S	16	1.7	87	245	1.3	1521	690.909
C4_8_S4	C44	4	8	S	17	1.91429	81	241	2.1	2547	285.714
C5_8_S1	C51	5	8	S	13	1.45714	88	246	1.4	867	450
C5_8_S2	C52	5	8	S	8	0.8	55	136	0.8	533	685.714
C5_8_S3	C53	5	8	S	17	2.1375	161	284	2.2	1668	794.444
C5_8_S4	C54	5	8	S	13	0.6	74	191	1.15	1316	957.143

## Sheet: Growth&Weight Exp1
unit	unit code	dryfall	light	DWA	DWRH	DWRoots	DWBelow	DWT	RGRWW	ABratio
C1_0_L1	C11	0	L	0.0068	0.0058	0.0179	0.0237	0.0305	0.0135664	0.28692
C1_0_L2	C12	0	L	0.0085	0.0111	0.0218	0.0329	0.0414	0.0124397	0.258359
C1_0_L3	C13	0	L	0.0171	0.0091	0.0246	0.0337	0.0508	0.00941932	0.507418
C1_0_L4	C14	0	L	0.0235	0.0353	0.0431	0.0784	0.1019	0.0125709	0.299745
C2_0_L1	C21	0	L	0.0226	0.0369	0.0632	0.1001	0.1227	0.0214026	0.225774
C2_0_L2	C22	0	L	0.0111	0.0227	0.0233	0.046	0.0571	0.0164308	0.241304
C2_0_L3	C23	0	L	0.0187	0.1076	0.2847	0.3923	0.411	0.025072	0.0476676
C2_0_L4	C24	0	L	0.0168	0.0691	0.0781	0.1472	0.164	0.0175718	0.11413
C3_0_L1	C31	0	L	0.0097	NA	NA	NA	0.0097	0.00923872	NA
C3_0_L2	C32	0	L	0.006	0.0095	0.0067	0.0162	0.0222	-0.00254708	0.37037
C3_0_L3	C33	0	L	0.0062	0.018	0.011	0.029	0.0352	0.00628571	0.213793
C3_0_L4	C34	0	L	0.0114	0.0169	0.0072	0.0241	0.0355	0.00818198	0.473029
C4_0_L1	C41	0	L	0.0091	0.0094	0.0171	0.0265	0.0356	0.016037	0.343396
C4_0_L2	C42	0	L	0.0205	0.0134	0.0283	0.0417	0.0622	0.0233833	0.491607
C4_0_L3	C43	0	L	0.0168	0.0199	0.0454	0.0653	0.0821	0.0161732	0.257274
C4_0_L4	C44	0	L	0.0132	0.0271	0.023	0.0501	0.0633	0.0259413	0.263473
C5_0_L1	C51	0	L	0.0076	0.0085	0.0207	0.0292	0.0368	0.00454261	0.260274
C5_0_L2	C52	0	L	0.0086	0.0479	0.0434	0.0913	0.0999	0.0174448	0.094195
C5_0_L3	C53	0	L	0.0199	0.0554	0.1034	0.1588	0.1787	0.0286665	0.125315
C5_0_L4	C54	0	L	0.013	0.0177	0.031	0.0487	0.0617	0.00909316	0.26694
C1_4_L1	C11	4	L	0.0165	0.0226	0.0369	0.0595	0.076	0.0210328	0.277311
C1_4_L2	C12	4	L	0.0231	0.0118	0.0316	0.0434	0.0665	0.00549213	0.532258
C1_4_L3	C13	4	L	0.0218	0.0345	0.0435	0.078	0.0998	0.0254334	0.279487
C1_4_L4	C14	4	L	0.0102	0.0074	0.0187	0.0261	0.0363	0.012329	0.390805
C2_4_L1	C21	4	L	0.0111	0.0134	0.0209	0.0343	0.0454	0.0170229	0.323615
C2_4_L2	C22	4	L	0.0138	0.0204	0.0253	0.0457	0.0595	0.0135811	0.301969
C2_4_L3	C23	4	L	0.008	0.0288	0.0425	0.0713	0.0793	0.0192217	0.112202
C2_4_L4	C24	4	L	0.0124	0.0145	0.0359	0.0504	0.0628	0.00532138	0.246032
C3_4_L1	C31	4	L	0.0036	0.0181	0.0148	0.0329	0.0365	0.00357637	0.109422
C3_4_L2	C32	4	L	0.0031	0.0094	0.0098	0.0192	0.0223	-0.0072849	0.161458
C3_4_L3	C33	4	L	0.0132	0.0366	0.0166	0.0532	0.0664	0.00207522	0.24812
C3_4_L4	C34	4	L	0.0098	0.0292	0.0197	0.0489	0.0587	0.0129319	0.200409
C4_4_L1	C41	4	L	0.0114	0.0189	0.0217	0.0406	0.052	0.0119209	0.280788
C4_4_L2	C42	4	L	0.0158	0.0158	0.022	0.0378	0.0536	0.0163013	0.417989
C4_4_L3	C43	4	L	0.015	0.0474	0.0203	0.0677	0.0827	0.0198803	0.221566
C4_4_L4	C44	4	L	0.0119	0.0336	0.019	0.0526	0.0645	0.0100204	0.226236
C5_4_L1	C51	4	L	0.0102	0.0129	0.03	0.0429	0.0531	0.00865346	0.237762
C5_4_L2	C52	4	L	0.0145	0.0239	0.0342	0.0581	0.0726	0.0280066	0.24957
C5_4_L3	C53	4	L	0.0074	0.0137	0.0586	0.0723	0.0797	0.0116218	0.102351
C5_4_L4	C54	4	L	0.0112	0.0178	0.0295	0.0473	0.0585	0.013778	0.236786
C1_6_L1	C11	6	L	0.0079	0.013	0.0144	0.0274	0.0353	0.0193689	0.288321
C1_6_L2	C12	6	L	0.023	0.0274	0.0749	0.1023	0.1253	0.0226143	0.224829
C1_6_L3	C13	6	L	0.0201	0.0252	0.0482	0.0734	0.0935	0.0228449	0.273842
C1_6_L4	C14	6	L	0.0154	0.0132	0.0323	0.0455	0.0609	0.0147363	0.338462
C2_6_L1	C21	6	L	0.0121	0.0325	0.0252	0.0577	0.0698	0.0064183	0.209705
C2_6_L2	C22	6	L	0.0163	0.0156	0.0608	0.0764	0.0927	0.0185155	0.213351
C2_6_L3	C23	6	L	0.0075	0.024	0.0151	0.0391	0.0466	0.0131609	0.191816
C2_6_L4	C24	6	L	0.0057	0.006	0.0075	0.0135	0.0192	0.00158048	0.422222
C3_6_L1	C31	6	L	0.011	0.0309	0.0219	0.0528	0.0638	0.000648346	0.208333
C3_6_L2	C32	6	L	0.0068	0.0132	0.0086	0.0218	0.0286	0.00665407	0.311927
C3_6_L3	C33	6	L	0.0076	0.0117	0.0111	0.0228	0.0304	0.00469898	0.333333
C3_6_L4	C34	6	L	0.0058	0.0097	0.0174	0.0271	0.0329	-0.00451221	0.214022
C4_6_L1	C41	6	L	0.0115	0.0214	0.0441	0.0655	0.077	0.0173087	0.175573
C4_6_L2	C42	6	L	0.0072	0.0109	0.0174	0.0283	0.0355	0.00175168	0.254417
C4_6_L3	C43	6	L	0.0135	0.0282	0.0266	0.0548	0.0683	0.0137705	0.24635
C4_6_L4	C44	6	L	0.0051	0.0127	0.0151	0.0278	0.0329	0.00866349	0.183453
C5_6_L1	C51	6	L	0.0121	0.0295	0.0189	0.0484	0.0605	0.0230184	0.25
C5_6_L2	C52	6	L	0.0139	0.016	0.0293	0.0453	0.0592	0.0105081	0.306843
C5_6_L3	C53	6	L	0.01	0.0247	0.291	0.3157	0.3257	0.012218	0.0316756
C5_6_L4	C54	6	L	0.0033	0.0025	0.0028	0.0053	0.0086	-0.00219249	0.622642
C1_8_L1	C11	8	L	0.0154	0.0122	0.03	0.0422	0.0576	0.0173792	0.364929
C1_8_L2	C12	8	L	0.018	0.0151	0.05	0.0651	0.0831	0.0134254	0.276498
C1_8_L3	C13	8	L	0.0204	0.0229	0.0389	0.0618	0.0822	0.0147576	0.330097
C1_8_L4	C14	8	L	0.0115	0.0166	0.0136	0.0302	0.0417	0.00764717	0.380795
C2_8_L1	C21	8	L	0.0064	0.0094	0.024	0.0334	0.0398	0.00245174	0.191617
C2_8_L2	C22	8	L	0.0075	0.009	0.033	0.042	0.0495	0.014833	0.178571
C2_8_L3	C23	8	L	0.0143	0.0201	0.0147	0.0348	0.0491	0.00928702	0.41092
C2_8_L4	C24	8	L	0.0081	0.0094	0.0186	0.028	0.0361	0.0107667	0.289286
C3_8_L1	C31	8	L	0.0076	0.0109	0.0191	0.03	0.0376	0.00784888	0.253333
C3_8_L2	C32	8	L	0.0035	0.0047	0.0109	0.0156	0.0191	-0.00350662	0.224359
C3_8_L3	C33	8	L	0.0079	0.0496	0.0259	0.0755	0.0834	0.0167767	0.104636
C3_8_L4	C34	8	L	0.0063	0.0164	NA	NA	0.0227	0.00765004	0.384146
C4_8_L1	C41	8	L	0.0062	0.0124	0.01	0.0224	0.0286	0.00399733	0.276786
C4_8_L2	C42	8	L	0.0048	0.0071	0.0108	0.0179	0.0227	0.000159873	0.268156
C4_8_L3	C43	8	L	0.0116	0.0209	0.0537	0.0746	0.0862	0.0216261	0.155496
C4_8_L4	C44	8	L	0.0043	0.0115	0.0111	0.0226	0.0269	6.71593e-05	0.190265
C5_8_L1	C51	8	L	0.0066	0.007	0.0176	0.0246	0.0312	0.0183624	0.268293
C5_8_L2	C52	8	L	0.0101	0.026	0.0249	0.0509	0.061	0.00344131	0.198428
C5_8_L3	C53	8	L	0.0071	0.0127	0.0081	0.0208	0.0279	0.00809811	0.341346
C5_8_L4	C54	8	L	0.0089	0.0217	0.0213	0.043	0.0519	0.0113551	0.206977
C1_0_S1	C11	0	S	0.025	0.0091	0.0142	0.0233	0.0483	0.0117916	1.07296
C1_0_S2	C12	0	S	0.0101	0.0084	0.0077	0.0161	0.0262	0.0107371	0.627329
C1_0_S3	C13	0	S	0.0195	0.0107	0.0242	0.0349	0.0544	0.00989605	0.558739
C1_0_S4	C14	0	S	0.0383	0.0273	0.1496	0.1769	0.2152	0.0314824	0.216507
C2_0_S1	C21	0	S	0.0137	0.0062	0.0222	0.0284	0.0421	0.00790447	0.482394
C2_0_S2	C22	0	S	0.0154	0.0101	0.0189	0.029	0.0444	0.0145967	0.531034
C2_0_S3	C23	0	S	0.0177	0.0279	0.0356	0.0635	0.0812	0.00895345	0.27874
C2_0_S4	C24	0	S	0.0127	0.0657	0.0345	0.1002	0.1129	0.00419485	0.126747
C3_0_S1	C31	0	S	0.0154	0.0083	0.013	0.0213	0.0367	0.00111348	0.723005
C3_0_S2	C32	0	S	0.0047	0.0067	0.0057	0.0124	0.0171	0.00982448	0.379032
C3_0_S3	C33	0	S	0.0074	0.0056	0.0093	0.0149	0.0223	0.00176777	0.496644
C3_0_S4	C34	0	S	0.0037	0.006	0.0096	0.0156	0.0193	0.000712794	0.237179
C4_0_S1	C41	0	S	0.0211	0.011	0.0359	0.0469	0.068	0.0101275	0.449893
C4_0_S2	C42	0	S	0.0239	0.0856	0.0776	0.1632	0.1871	0.0267355	0.146446
C4_0_S3	C43	0	S	0.0084	0.005	0.0069	0.0119	0.0203	-0.00223294	0.705882
C4_0_S4	C44	0	S	0.0166	0.0176	0.0359	0.0535	0.0701	0.02297	0.31028
C5_0_S1	C51	0	S	0.0139	0.0207	0.016	0.0367	0.0506	0.0172395	0.378747
C5_0_S2	C52	0	S	0.0146	0.0094	0.0138	0.0232	0.0378	0.00356711	0.62931
C5_0_S3	C53	0	S	0.0117	0.0063	0.0091	0.0154	0.0271	0.0122279	0.75974
C5_0_S4	C54	0	S	0.009	0.0102	0.0136	0.0238	0.0328	0.0121622	0.378151
C1_4_S1	C11	4	S	0.0252	0.0214	0.0237	0.0451	0.0703	0.00844905	0.558758
C1_4_S2	C12	4	S	0.0175	0.0132	0.0142	0.0274	0.0449	0.0197364	0.638686
C1_4_S3	C13	4	S	0.0183	0.0144	0.0095	0.0239	0.0422	0.00658196	0.76569
C1_4_S4	C14	4	S	0.0256	0.011	0.019	0.03	0.0556	0.015093	0.853333
C2_4_S1	C21	4	S	0.012	0.0067	0.0083	0.015	0.027	0.00945265	0.8
C2_4_S2	C22	4	S	0.0065	0.0182	0.0107	0.0289	0.0354	0.00908795	0.224913
C2_4_S3	C23	4	S	0.0082	0.0056	0.0061	0.0117	0.0199	0.0106311	0.700855
C2_4_S4	C24	4	S	0.0137	0.0104	0.0182	0.0286	0.0423	0.0141665	0.479021
C3_4_S1	C31	4	S	0.0047	0.0062	0.0043	0.0105	0.0152	-0.00130251	0.447619
C3_4_S2	C32	4	S	0.0051	0.0056	0.0047	0.0103	0.0154	0.0084016	0.495146
C3_4_S3	C33	4	S	0.0026	0.005	0.003	0.008	0.0106	-0.00630727	0.325
C3_4_S4	C34	4	S	0.0106	0.0258	0.0211	0.0469	0.0575	0.00822329	0.226013
C4_4_S1	C41	4	S	0.0099	0.0116	0.0151	0.0267	0.0366	0.0045171	0.370787
C4_4_S2	C42	4	S	0.0128	0.0091	0.0212	0.0303	0.0431	0.0147116	0.422442
C4_4_S3	C43	4	S	0.0116	0.0179	0.0223	0.0402	0.0518	0.0156027	0.288557
C4_4_S4	C44	4	S	0.0159	0.0176	0.0437	0.0613	0.0772	0.0184723	0.25938
C5_4_S1	C51	4	S	0.0203	0.0331	0.0725	0.1056	0.1259	0.0266138	0.192235
C5_4_S2	C52	4	S	0.01	0.0105	0.0103	0.0208	0.0308	0.00545545	0.480769
C5_4_S3	C53	4	S	0.0083	0.0097	0.0162	0.0259	0.0342	0.0145871	0.320463
C5_4_S4	C54	4	S	0.0044	0.0071	0.0108	0.0179	0.0223	0.000833507	0.24581
C1_6_S1	C11	6	S	0.0138	0.0113	0.0366	0.0479	0.0617	0.0139169	0.2881
C1_6_S2	C12	6	S	0.0123	0.0101	0.0189	0.029	0.0413	0.00979478	0.424138
C1_6_S3	C13	6	S	0.0168	0.0104	0.0109	0.0213	0.0381	0.00239792	0.788732
C1_6_S4	C14	6	S	0.0263	0.006	0.0133	0.0193	0.0456	0.0142868	1.36269
C2_6_S1	C21	6	S	0.0139	0.0104	0.0196	0.03	0.0439	-0.000445245	0.463333
C2_6_S2	C22	6	S	0.0089	0.011	0.0083	0.0193	0.0282	0.0100051	0.46114
C2_6_S3	C23	6	S	0.0307	0.0322	0.0687	0.1009	0.1316	0.0098879	0.304262
C2_6_S4	C24	6	S	0.0233	0.0207	0.0186	0.0393	0.0626	0.000119475	0.592875
C3_6_S1	C31	6	S	0.015	0.0108	0.0267	0.0375	0.0525	0.00485455	0.4
C3_6_S2	C32	6	S	0.0103	0.0093	0.0185	0.0278	0.0381	0.0131891	0.370504
C3_6_S3	C33	6	S	0.0048	0.0062	0.0049	0.0111	0.0159	0.00675775	0.432432
C3_6_S4	C34	6	S	0.0078	0.0052	0.0097	0.0149	0.0227	0.00286143	0.52349
C4_6_S1	C41	6	S	0.0053	0.0046	0.0095	0.0141	0.0194	0.00182876	0.375887
C4_6_S2	C42	6	S	0.02	0.0312	0.0381	0.0693	0.0893	0.0210781	0.2886
C4_6_S3	C43	6	S	0.0155	0.0134	0.0163	0.0297	0.0452	0.0129408	0.521886
C4_6_S4	C44	6	S	0.0137	0.0098	0.0127	0.0225	0.0362	0.013778	0.608889
C5_6_S1	C51	6	S	0.0115	0.0121	0.0171	0.0292	0.0407	0.011852	0.393836
C5_6_S2	C52	6	S	0.0205	0.0346	0.0371	0.0717	0.0922	0.0112824	0.285914
C5_6_S3	C53	6	S	0.0118	0.018	0.0164	0.0344	0.0462	0.0176717	0.343023
C5_6_S4	C54	6	S	0.0088	0.0335	0.0361	0.0696	0.0784	0.00922959	0.126437
C1_8_S1	C11	8	S	0.0158	0.0202	0.015	0.0352	0.051	0.0051491	0.448864
C1_8_S2	C12	8	S	0.0077	0.0053	0.0089	0.0142	0.0219	0.00484911	0.542254
C1_8_S3	C13	8	S	0.0139	0.012	0.0189	0.0309	0.0448	0.0145517	0.449838
C1_8_S4	C14	8	S	0.0088	0.0109	0.0157	0.0266	0.0354	0.00826138	0.330827
C2_8_S1	C21	8	S	0.0124	0.0163	0.0502	0.0665	0.0789	0.0129237	0.186466
C2_8_S2	C22	8	S	0.0106	0.007	0.0136	0.0206	0.0312	0.00680923	0.514563
C2_8_S3	C23	8	S	0.011	0.0348	0.0305	0.0653	0.0763	0.00792101	0.168453
C2_8_S4	C24	8	S	0.0065	0.0571	0.0287	0.0858	0.0923	0.00361046	0.0757576
C3_8_S1	C31	8	S	0.0036	0.0058	0.0098	0.0156	0.0192	-0.00395052	0.230769
C3_8_S2	C32	8	S	0.0124	0.009	0.0168	0.0258	0.0382	0.00706834	0.48062
C3_8_S3	C33	8	S	0.0095	0.0068	0.0121	0.0189	0.0284	0.000668897	0.502646
C3_8_S4	C34	8	S	0.0025	0.0057	0.0032	0.0089	0.0114	-0.000777343	0.280899
C4_8_S1	C41	8	S	0.0129	0.0102	0.019	0.0292	0.0421	0.0186525	0.441781
C4_8_S2	C42	8	S	0.0086	0.0056	0.012	0.0176	0.0262	0.00601575	0.488636
C4_8_S3	C43	8	S	0.0135	0.0102	0.0147	0.0249	0.0384	0.0125082	0.542169
C4_8_S4	C44	8	S	0.0122	0.0175	0.022	0.0395	0.0517	0.0126008	0.308861
C5_8_S1	C51	8	S	0.0238	0.0184	0.0339	0.0523	0.0761	0.0117708	0.455067
C5_8_S2	C52	8	S	0.0094	0.0093	0.023	0.0323	0.0417	0.0114277	0.291022
C5_8_S3	C53	8	S	0.0219	0.0309	0.0288	0.0597	0.0816	0.00974935	0.366834
C5_8_S4	C54	8	S	0.01	0.009	0.0181	0.0271	0.0371	0.0107439	0.369004

## Sheet: Morpho Exp2
unit	unit code	dryfall	light	DWA	DWRH	DWRoots	DWBelow	DWT	RGRWW	ABratio
C1_0_L1	C11	0	L	0.0068	0.0058	0.0179	0.0237	0.0305	0.0135664	0.28692
C1_0_L2	C12	0	L	0.0085	0.0111	0.0218	0.0329	0.0414	0.0124397	0.258359
C1_0_L3	C13	0	L	0.0171	0.0091	0.0246	0.0337	0.0508	0.00941932	0.507418
C1_0_L4	C14	0	L	0.0235	0.0353	0.0431	0.0784	0.1019	0.0125709	0.299745
C2_0_L1	C21	0	L	0.0226	0.0369	0.0632	0.1001	0.1227	0.0214026	0.225774
C2_0_L2	C22	0	L	0.0111	0.0227	0.0233	0.046	0.0571	0.0164308	0.241304
C2_0_L3	C23	0	L	0.0187	0.1076	0.2847	0.3923	0.411	0.025072	0.0476676
C2_0_L4	C24	0	L	0.0168	0.0691	0.0781	0.1472	0.164	0.0175718	0.11413
C3_0_L1	C31	0	L	0.0097	NA	NA	NA	0.0097	0.00923872	NA
C3_0_L2	C32	0	L	0.006	0.0095	0.0067	0.0162	0.0222	-0.00254708	0.37037
C3_0_L3	C33	0	L	0.0062	0.018	0.011	0.029	0.0352	0.00628571	0.213793
C3_0_L4	C34	0	L	0.0114	0.0169	0.0072	0.0241	0.0355	0.00818198	0.473029
C4_0_L1	C41	0	L	0.0091	0.0094	0.0171	0.0265	0.0356	0.016037	0.343396
C4_0_L2	C42	0	L	0.0205	0.0134	0.0283	0.0417	0.0622	0.0233833	0.491607
C4_0_L3	C43	0	L	0.0168	0.0199	0.0454	0.0653	0.0821	0.0161732	0.257274
C4_0_L4	C44	0	L	0.0132	0.0271	0.023	0.0501	0.0633	0.0259413	0.263473
C5_0_L1	C51	0	L	0.0076	0.0085	0.0207	0.0292	0.0368	0.00454261	0.260274
C5_0_L2	C52	0	L	0.0086	0.0479	0.0434	0.0913	0.0999	0.0174448	0.094195
C5_0_L3	C53	0	L	0.0199	0.0554	0.1034	0.1588	0.1787	0.0286665	0.125315
C5_0_L4	C54	0	L	0.013	0.0177	0.031	0.0487	0.0617	0.00909316	0.26694
C1_4_L1	C11	4	L	0.0165	0.0226	0.0369	0.0595	0.076	0.0210328	0.277311
C1_4_L2	C12	4	L	0.0231	0.0118	0.0316	0.0434	0.0665	0.00549213	0.532258
C1_4_L3	C13	4	L	0.0218	0.0345	0.0435	0.078	0.0998	0.0254334	0.279487
C1_4_L4	C14	4	L	0.0102	0.0074	0.0187	0.0261	0.0363	0.012329	0.390805
C2_4_L1	C21	4	L	0.0111	0.0134	0.0209	0.0343	0.0454	0.0170229	0.323615
C2_4_L2	C22	4	L	0.0138	0.0204	0.0253	0.0457	0.0595	0.0135811	0.301969
C2_4_L3	C23	4	L	0.008	0.0288	0.0425	0.0713	0.0793	0.0192217	0.112202
C2_4_L4	C24	4	L	0.0124	0.0145	0.0359	0.0504	0.0628	0.00532138	0.246032
C3_4_L1	C31	4	L	0.0036	0.0181	0.0148	0.0329	0.0365	0.00357637	0.109422
C3_4_L2	C32	4	L	0.0031	0.0094	0.0098	0.0192	0.0223	-0.0072849	0.161458
C3_4_L3	C33	4	L	0.0132	0.0366	0.0166	0.0532	0.0664	0.00207522	0.24812
C3_4_L4	C34	4	L	0.0098	0.0292	0.0197	0.0489	0.0587	0.0129319	0.200409
C4_4_L1	C41	4	L	0.0114	0.0189	0.0217	0.0406	0.052	0.0119209	0.280788
C4_4_L2	C42	4	L	0.0158	0.0158	0.022	0.0378	0.0536	0.0163013	0.417989
C4_4_L3	C43	4	L	0.015	0.0474	0.0203	0.0677	0.0827	0.0198803	0.221566
C4_4_L4	C44	4	L	0.0119	0.0336	0.019	0.0526	0.0645	0.0100204	0.226236
C5_4_L1	C51	4	L	0.0102	0.0129	0.03	0.0429	0.0531	0.00865346	0.237762
C5_4_L2	C52	4	L	0.0145	0.0239	0.0342	0.0581	0.0726	0.0280066	0.24957
C5_4_L3	C53	4	L	0.0074	0.0137	0.0586	0.0723	0.0797	0.0116218	0.102351
C5_4_L4	C54	4	L	0.0112	0.0178	0.0295	0.0473	0.0585	0.013778	0.236786
C1_6_L1	C11	6	L	0.0079	0.013	0.0144	0.0274	0.0353	0.0193689	0.288321
C1_6_L2	C12	6	L	0.023	0.0274	0.0749	0.1023	0.1253	0.0226143	0.224829
C1_6_L3	C13	6	L	0.0201	0.0252	0.0482	0.0734	0.0935	0.0228449	0.273842
C1_6_L4	C14	6	L	0.0154	0.0132	0.0323	0.0455	0.0609	0.0147363	0.338462
C2_6_L1	C21	6	L	0.0121	0.0325	0.0252	0.0577	0.0698	0.0064183	0.209705
C2_6_L2	C22	6	L	0.0163	0.0156	0.0608	0.0764	0.0927	0.0185155	0.213351
C2_6_L3	C23	6	L	0.0075	0.024	0.0151	0.0391	0.0466	0.0131609	0.191816
C2_6_L4	C24	6	L	0.0057	0.006	0.0075	0.0135	0.0192	0.00158048	0.422222
C3_6_L1	C31	6	L	0.011	0.0309	0.0219	0.0528	0.0638	0.000648346	0.208333
C3_6_L2	C32	6	L	0.0068	0.0132	0.0086	0.0218	0.0286	0.00665407	0.311927
C3_6_L3	C33	6	L	0.0076	0.0117	0.0111	0.0228	0.0304	0.00469898	0.333333
C3_6_L4	C34	6	L	0.0058	0.0097	0.0174	0.0271	0.0329	-0.00451221	0.214022
C4_6_L1	C41	6	L	0.0115	0.0214	0.0441	0.0655	0.077	0.0173087	0.175573
C4_6_L2	C42	6	L	0.0072	0.0109	0.0174	0.0283	0.0355	0.00175168	0.254417
C4_6_L3	C43	6	L	0.0135	0.0282	0.0266	0.0548	0.0683	0.0137705	0.24635
C4_6_L4	C44	6	L	0.0051	0.0127	0.0151	0.0278	0.0329	0.00866349	0.183453
C5_6_L1	C51	6	L	0.0121	0.0295	0.0189	0.0484	0.0605	0.0230184	0.25
C5_6_L2	C52	6	L	0.0139	0.016	0.0293	0.0453	0.0592	0.0105081	0.306843
C5_6_L3	C53	6	L	0.01	0.0247	0.291	0.3157	0.3257	0.012218	0.0316756
C5_6_L4	C54	6	L	0.0033	0.0025	0.0028	0.0053	0.0086	-0.00219249	0.622642
C1_8_L1	C11	8	L	0.0154	0.0122	0.03	0.0422	0.0576	0.0173792	0.364929
C1_8_L2	C12	8	L	0.018	0.0151	0.05	0.0651	0.0831	0.0134254	0.276498
C1_8_L3	C13	8	L	0.0204	0.0229	0.0389	0.0618	0.0822	0.0147576	0.330097
C1_8_L4	C14	8	L	0.0115	0.0166	0.0136	0.0302	0.0417	0.00764717	0.380795
C2_8_L1	C21	8	L	0.0064	0.0094	0.024	0.0334	0.0398	0.00245174	0.191617
C2_8_L2	C22	8	L	0.0075	0.009	0.033	0.042	0.0495	0.014833	0.178571
C2_8_L3	C23	8	L	0.0143	0.0201	0.0147	0.0348	0.0491	0.00928702	0.41092
C2_8_L4	C24	8	L	0.0081	0.0094	0.0186	0.028	0.0361	0.0107667	0.289286
C3_8_L1	C31	8	L	0.0076	0.0109	0.0191	0.03	0.0376	0.00784888	0.253333
C3_8_L2	C32	8	L	0.0035	0.0047	0.0109	0.0156	0.0191	-0.00350662	0.224359
C3_8_L3	C33	8	L	0.0079	0.0496	0.0259	0.0755	0.0834	0.0167767	0.104636
C3_8_L4	C34	8	L	0.0063	0.0164	NA	NA	0.0227	0.00765004	0.384146
C4_8_L1	C41	8	L	0.0062	0.0124	0.01	0.0224	0.0286	0.00399733	0.276786
C4_8_L2	C42	8	L	0.0048	0.0071	0.0108	0.0179	0.0227	0.000159873	0.268156
C4_8_L3	C43	8	L	0.0116	0.0209	0.0537	0.0746	0.0862	0.0216261	0.155496
C4_8_L4	C44	8	L	0.0043	0.0115	0.0111	0.0226	0.0269	6.71593e-05	0.190265
C5_8_L1	C51	8	L	0.0066	0.007	0.0176	0.0246	0.0312	0.0183624	0.268293
C5_8_L2	C52	8	L	0.0101	0.026	0.0249	0.0509	0.061	0.00344131	0.198428
C5_8_L3	C53	8	L	0.0071	0.0127	0.0081	0.0208	0.0279	0.00809811	0.341346
C5_8_L4	C54	8	L	0.0089	0.0217	0.0213	0.043	0.0519	0.0113551	0.206977
C1_0_S1	C11	0	S	0.025	0.0091	0.0142	0.0233	0.0483	0.0117916	1.07296
C1_0_S2	C12	0	S	0.0101	0.0084	0.0077	0.0161	0.0262	0.0107371	0.627329
C1_0_S3	C13	0	S	0.0195	0.0107	0.0242	0.0349	0.0544	0.00989605	0.558739
C1_0_S4	C14	0	S	0.0383	0.0273	0.1496	0.1769	0.2152	0.0314824	0.216507
C2_0_S1	C21	0	S	0.0137	0.0062	0.0222	0.0284	0.0421	0.00790447	0.482394
C2_0_S2	C22	0	S	0.0154	0.0101	0.0189	0.029	0.0444	0.0145967	0.531034
C2_0_S3	C23	0	S	0.0177	0.0279	0.0356	0.0635	0.0812	0.00895345	0.27874
C2_0_S4	C24	0	S	0.0127	0.0657	0.0345	0.1002	0.1129	0.00419485	0.126747
C3_0_S1	C31	0	S	0.0154	0.0083	0.013	0.0213	0.0367	0.00111348	0.723005
C3_0_S2	C32	0	S	0.0047	0.0067	0.0057	0.0124	0.0171	0.00982448	0.379032
C3_0_S3	C33	0	S	0.0074	0.0056	0.0093	0.0149	0.0223	0.00176777	0.496644
C3_0_S4	C34	0	S	0.0037	0.006	0.0096	0.0156	0.0193	0.000712794	0.237179
C4_0_S1	C41	0	S	0.0211	0.011	0.0359	0.0469	0.068	0.0101275	0.449893
C4_0_S2	C42	0	S	0.0239	0.0856	0.0776	0.1632	0.1871	0.0267355	0.146446
C4_0_S3	C43	0	S	0.0084	0.005	0.0069	0.0119	0.0203	-0.00223294	0.705882
C4_0_S4	C44	0	S	0.0166	0.0176	0.0359	0.0535	0.0701	0.02297	0.31028
C5_0_S1	C51	0	S	0.0139	0.0207	0.016	0.0367	0.0506	0.0172395	0.378747
C5_0_S2	C52	0	S	0.0146	0.0094	0.0138	0.0232	0.0378	0.00356711	0.62931
C5_0_S3	C53	0	S	0.0117	0.0063	0.0091	0.0154	0.0271	0.0122279	0.75974
C5_0_S4	C54	0	S	0.009	0.0102	0.0136	0.0238	0.0328	0.0121622	0.378151
C1_4_S1	C11	4	S	0.0252	0.0214	0.0237	0.0451	0.0703	0.00844905	0.558758
C1_4_S2	C12	4	S	0.0175	0.0132	0.0142	0.0274	0.0449	0.0197364	0.638686
C1_4_S3	C13	4	S	0.0183	0.0144	0.0095	0.0239	0.0422	0.00658196	0.76569
C1_4_S4	C14	4	S	0.0256	0.011	0.019	0.03	0.0556	0.015093	0.853333
C2_4_S1	C21	4	S	0.012	0.0067	0.0083	0.015	0.027	0.00945265	0.8
C2_4_S2	C22	4	S	0.0065	0.0182	0.0107	0.0289	0.0354	0.00908795	0.224913
C2_4_S3	C23	4	S	0.0082	0.0056	0.0061	0.0117	0.0199	0.0106311	0.700855
C2_4_S4	C24	4	S	0.0137	0.0104	0.0182	0.0286	0.0423	0.0141665	0.479021
C3_4_S1	C31	4	S	0.0047	0.0062	0.0043	0.0105	0.0152	-0.00130251	0.447619
C3_4_S2	C32	4	S	0.0051	0.0056	0.0047	0.0103	0.0154	0.0084016	0.495146
C3_4_S3	C33	4	S	0.0026	0.005	0.003	0.008	0.0106	-0.00630727	0.325
C3_4_S4	C34	4	S	0.0106	0.0258	0.0211	0.0469	0.0575	0.00822329	0.226013
C4_4_S1	C41	4	S	0.0099	0.0116	0.0151	0.0267	0.0366	0.0045171	0.370787
C4_4_S2	C42	4	S	0.0128	0.0091	0.0212	0.0303	0.0431	0.0147116	0.422442
C4_4_S3	C43	4	S	0.0116	0.0179	0.0223	0.0402	0.0518	0.0156027	0.288557
C4_4_S4	C44	4	S	0.0159	0.0176	0.0437	0.0613	0.0772	0.0184723	0.25938
C5_4_S1	C51	4	S	0.0203	0.0331	0.0725	0.1056	0.1259	0.0266138	0.192235
C5_4_S2	C52	4	S	0.01	0.0105	0.0103	0.0208	0.0308	0.00545545	0.480769
C5_4_S3	C53	4	S	0.0083	0.0097	0.0162	0.0259	0.0342	0.0145871	0.320463
C5_4_S4	C54	4	S	0.0044	0.0071	0.0108	0.0179	0.0223	0.000833507	0.24581
C1_6_S1	C11	6	S	0.0138	0.0113	0.0366	0.0479	0.0617	0.0139169	0.2881
C1_6_S2	C12	6	S	0.0123	0.0101	0.0189	0.029	0.0413	0.00979478	0.424138
C1_6_S3	C13	6	S	0.0168	0.0104	0.0109	0.0213	0.0381	0.00239792	0.788732
C1_6_S4	C14	6	S	0.0263	0.006	0.0133	0.0193	0.0456	0.0142868	1.36269
C2_6_S1	C21	6	S	0.0139	0.0104	0.0196	0.03	0.0439	-0.000445245	0.463333
C2_6_S2	C22	6	S	0.0089	0.011	0.0083	0.0193	0.0282	0.0100051	0.46114
C2_6_S3	C23	6	S	0.0307	0.0322	0.0687	0.1009	0.1316	0.0098879	0.304262
C2_6_S4	C24	6	S	0.0233	0.0207	0.0186	0.0393	0.0626	0.000119475	0.592875
C3_6_S1	C31	6	S	0.015	0.0108	0.0267	0.0375	0.0525	0.00485455	0.4
C3_6_S2	C32	6	S	0.0103	0.0093	0.0185	0.0278	0.0381	0.0131891	0.370504
C3_6_S3	C33	6	S	0.0048	0.0062	0.0049	0.0111	0.0159	0.00675775	0.432432
C3_6_S4	C34	6	S	0.0078	0.0052	0.0097	0.0149	0.0227	0.00286143	0.52349
C4_6_S1	C41	6	S	0.0053	0.0046	0.0095	0.0141	0.0194	0.00182876	0.375887
C4_6_S2	C42	6	S	0.02	0.0312	0.0381	0.0693	0.0893	0.0210781	0.2886
C4_6_S3	C43	6	S	0.0155	0.0134	0.0163	0.0297	0.0452	0.0129408	0.521886
C4_6_S4	C44	6	S	0.0137	0.0098	0.0127	0.0225	0.0362	0.013778	0.608889
C5_6_S1	C51	6	S	0.0115	0.0121	0.0171	0.0292	0.0407	0.011852	0.393836
C5_6_S2	C52	6	S	0.0205	0.0346	0.0371	0.0717	0.0922	0.0112824	0.285914
C5_6_S3	C53	6	S	0.0118	0.018	0.0164	0.0344	0.0462	0.0176717	0.343023
C5_6_S4	C54	6	S	0.0088	0.0335	0.0361	0.0696	0.0784	0.00922959	0.126437
C1_8_S1	C11	8	S	0.0158	0.0202	0.015	0.0352	0.051	0.0051491	0.448864
C1_8_S2	C12	8	S	0.0077	0.0053	0.0089	0.0142	0.0219	0.00484911	0.542254
C1_8_S3	C13	8	S	0.0139	0.012	0.0189	0.0309	0.0448	0.0145517	0.449838
C1_8_S4	C14	8	S	0.0088	0.0109	0.0157	0.0266	0.0354	0.00826138	0.330827
C2_8_S1	C21	8	S	0.0124	0.0163	0.0502	0.0665	0.0789	0.0129237	0.186466
C2_8_S2	C22	8	S	0.0106	0.007	0.0136	0.0206	0.0312	0.00680923	0.514563
C2_8_S3	C23	8	S	0.011	0.0348	0.0305	0.0653	0.0763	0.00792101	0.168453
C2_8_S4	C24	8	S	0.0065	0.0571	0.0287	0.0858	0.0923	0.00361046	0.0757576
C3_8_S1	C31	8	S	0.0036	0.0058	0.0098	0.0156	0.0192	-0.00395052	0.230769
C3_8_S2	C32	8	S	0.0124	0.009	0.0168	0.0258	0.0382	0.00706834	0.48062
C3_8_S3	C33	8	S	0.0095	0.0068	0.0121	0.0189	0.0284	0.000668897	0.502646
C3_8_S4	C34	8	S	0.0025	0.0057	0.0032	0.0089	0.0114	-0.000777343	0.280899
C4_8_S1	C41	8	S	0.0129	0.0102	0.019	0.0292	0.0421	0.0186525	0.441781
C4_8_S2	C42	8	S	0.0086	0.0056	0.012	0.0176	0.0262	0.00601575	0.488636
C4_8_S3	C43	8	S	0.0135	0.0102	0.0147	0.0249	0.0384	0.0125082	0.542169
C4_8_S4	C44	8	S	0.0122	0.0175	0.022	0.0395	0.0517	0.0126008	0.308861
C5_8_S1	C51	8	S	0.0238	0.0184	0.0339	0.0523	0.0761	0.0117708	0.455067
C5_8_S2	C52	8	S	0.0094	0.0093	0.023	0.0323	0.0417	0.0114277	0.291022
C5_8_S3	C53	8	S	0.0219	0.0309	0.0288	0.0597	0.0816	0.00974935	0.366834
C5_8_S4	C54	8	S	0.01	0.009	0.0181	0.0271	0.0371	0.0107439	0.369004

## Sheet: Growth&Weight Exp2
unit	reservoir	aquarium	dryfall	salinity	origin	DW_AG	DW_Rhizome	DW_Roots	DW_BG	DW_Total	RGR_WW	AB/BG ratio
C3_1_J1	3	1	0	25	J	0.0083	0.0145	0.0281	0.0426	0.0509	0.0261574	0.194836
C3_1_J2	3	1	0	25	J	0.0051	0.0088	0.0075	0.0163	0.0214	0.0182209	0.312883
C3_1_J3	3	1	0	25	J	0.0115	0.0109	0.0196	0.0305	0.042	0.0248068	0.377049
C3_4_J1	3	4	0	25	J	0.0061	0.0051	0.0049	0.01	0.0161	0.010328	0.61
C3_4_J2	3	4	0	25	J	0.0063	0.0068	0.0101	0.0169	0.0232	0.0186328	0.372781
C3_4_J3	3	4	0	25	J	0.0048	0.0073	0.0176	0.0249	0.0297	0.0233016	0.192771
C6_1_J1	6	1	0	25	J	0.0082	0.0154	0.0629	0.0783	0.0865	0.0205508	0.104725
C6_1_J2	6	1	0	25	J	0.0041	0.0079	0.032	0.0399	0.044	0.0240334	0.102757
C6_1_J3	6	1	0	25	J	0.0098	0.0082	0.0206	0.0288	0.0386	0.0151721	0.340278
C6_4_J1	6	4	0	25	J	NA	NA	NA	NA	0	NA	NA
C6_4_J2	6	4	0	25	J	0.0023	0.004	0.0007	0.0047	0.007	-0.00166158	0.489362
C6_4_J3	6	4	0	25	J	0.0023	0.0049	0.0222	0.0271	0.0294	0.0105704	0.0848708
C3_1_O1	3	1	0	25	O	0.0062	0.0079	0.0174	0.0253	0.0315	0.0221133	0.245059
C3_1_O2	3	1	0	25	O	0.0039	0.0043	0.004	0.0083	0.0122	0.0157784	0.46988
C3_1_O3	3	1	0	25	O	0.0027	0.0036	0.0041	0.0077	0.0104	0.0151366	0.350649
C3_4_O1	3	4	0	25	O	0.0052	0.0046	0.0091	0.0137	0.0189	0.0228533	0.379562
C3_4_O2	3	4	0	25	O	0.0106	0.01	0.0099	0.0199	0.0305	0.0205272	0.532663
C3_4_O3	3	4	0	25	O	0.0012	0.0018	0.0017	0.0035	0.0047	0.0073716	0.342857
C6_1_O1	6	1	0	25	O	0.0097	0.0106	0.0349	0.0455	0.0552	0.0332469	0.213187
C6_1_O2	6	1	0	25	O	0.0067	0.0047	0.0139	0.0186	0.0253	0.02392	0.360215
C6_1_O3	6	1	0	25	O	0.0047	0.0046	0.0126	0.0172	0.0219	0.021173	0.273256
C6_4_O1	6	4	0	25	O	0.0053	0.0089	0.0208	0.0297	0.035	0.0247275	0.178451
C6_4_O2	6	4	0	25	O	0.003	0.0058	0.021	0.0268	0.0298	0.0245011	0.11194
C6_4_O3	6	4	0	25	O	0.0064	0.0099	0.0089	0.0188	0.0252	0.0193921	0.340426
C3_1_S1	3	1	0	25	S	0.0048	0.005	0.0078	0.0128	0.0176	0.0165613	0.375
C3_1_S2	3	1	0	25	S	0.0046	0.0078	0.0145	0.0223	0.0269	0.0206847	0.206278
C3_1_S3	3	1	0	25	S	0.0055	0.01	0.0076	0.0176	0.0231	0.017317	0.3125
C3_4_S1	3	4	0	25	S	0.0017	0.0037	0.0054	0.0091	0.0108	0.0151925	0.186813
C3_4_S2	3	4	0	25	S	0.0031	0.0035	0.0065	0.01	0.0131	0.019341	0.31
C3_4_S3	3	4	0	25	S	0.0043	0.0058	0.0193	0.0251	0.0294	0.0271092	0.171315
C6_1_S1	6	1	0	25	S	0.0028	0.0025	0.0067	0.0092	0.012	0.0194407	0.304348
C6_1_S2	6	1	0	25	S	0.0033	0.0036	0.0076	0.0112	0.0145	0.0265151	0.294643
C6_1_S3	6	1	0	25	S	0.0021	0.0029	0.009	0.0119	0.014	0.0213469	0.176471
C6_4_S1	6	4	0	25	S	0.0017	0.0033	0.0075	0.0108	0.0125	0.00749102	0.157407
C6_4_S2	6	4	0	25	S	0.0023	0.0025	0.0019	0.0044	0.0067	0.0144474	0.522727
C6_4_S3	6	4	0	25	S	0.003	0.0028	0.0016	0.0044	0.0074	0.00207827	0.681818
C1_1_J1	1	1	0	30	J	0.0114	0.0134	0.0297	0.0431	0.0545	0.0256777	0.264501
C1_1_J2	1	1	0	30	J	0.0111	0.0146	0.0259	0.0405	0.0516	0.0183622	0.274074
C1_1_J3	1	1	0	30	J	0.0044	0.0047	0.0118	0.0165	0.0209	0.0152114	0.266667
C1_4_J1	1	4	0	30	J	0.0093	0.0146	0.0194	0.034	0.0433	0.0237204	0.273529
C1_4_J2	1	4	0	30	J	0.0124	0.0186	0.0298	0.0484	0.0608	0.0230259	0.256198
C1_4_J3	1	4	0	30	J	0.006	0.0083	0.0144	0.0227	0.0287	0.0188641	0.264317
C5_1_J1	5	1	0	30	J	0.0082	0.0122	0.0227	0.0349	0.0431	0.0279459	0.234957
C5_1_J2	5	1	0	30	J	0.0063	0.0095	0.0151	0.0246	0.0309	0.0271575	0.256098
C5_1_J3	5	1	0	30	J	0.0063	0.0068	0.0057	0.0125	0.0188	0.00749461	0.504
C5_4_J1	5	4	0	30	J	0.0062	0.0099	0.0194	0.0293	0.0355	0.0205213	0.211604
C5_4_J2	5	4	0	30	J	0.0138	0.0208	0.0572	0.078	0.0918	0.0264098	0.176923
C5_4_J3	5	4	0	30	J	0.011	0.0173	0.0259	0.0432	0.0542	0.0223532	0.25463
C1_1_O1	1	1	0	30	O	0.0132	0.0132	0.0272	0.0404	0.0536	0.0287749	0.326733
C1_1_O2	1	1	0	30	O	0.0095	0.0033	0.033	0.0363	0.0458	0.0194959	0.261708
C1_1_O3	1	1	0	30	O	0.0054	0.0061	0.0062	0.0123	0.0177	0.00983029	0.439024
C1_4_O1	1	4	0	30	O	0.0044	0.0082	0.0138	0.022	0.0264	0.0235547	0.2
C1_4_O2	1	4	0	30	O	0.0049	0.0082	0.0084	0.0166	0.0215	0.0180108	0.295181
C1_4_O3	1	4	0	30	O	0.0044	0.0048	0.004	0.0088	0.0132	0.0163669	0.5
C5_1_O1	5	1	0	30	O	0.0113	0.0112	0.059	0.0702	0.0815	0.0403964	0.160969
C5_1_O2	5	1	0	30	O	0.0031	0.0025	0.0149	0.0174	0.0205	0.026601	0.178161
C5_1_O3	5	1	0	30	O	0.005	0.0074	0.0137	0.0211	0.0261	0.0292179	0.236967
C5_4_O1	5	4	0	30	O	0.0049	0.0103	0.0046	0.0149	0.0198	0.0106566	0.328859
C5_4_O2	5	4	0	30	O	0.0026	0.0027	0.01	0.0127	0.0153	0.014589	0.204724
C5_4_O3	5	4	0	30	O	0.0013	0.0032	0.0021	0.0053	0.0066	0.0118197	0.245283
C1_1_S1	1	1	0	30	S	0.0075	0.0035	0.0151	0.0186	0.0261	0.0123678	0.403226
C1_1_S2	1	1	0	30	S	0.0038	0.0034	0.0064	0.0098	0.0136	0.0122659	0.387755
C1_1_S3	1	1	0	30	S	0.0075	0.0089	0.0264	0.0353	0.0428	0.0358488	0.212465
C1_4_S1	1	4	0	30	S	0.0057	0.0082	0.0101	0.0183	0.024	0.020948	0.311475
C1_4_S2	1	4	0	30	S	0.0025	0.0033	0.0093	0.0126	0.0151	0.011412	0.198413
C1_4_S3	1	4	0	30	S	0.0016	0.003	0.0019	0.0049	0.0065	0.0134475	0.326531
C5_1_S1	5	1	0	30	S	NA	NA	NA	NA	0	NA	NA
C5_1_S2	5	1	0	30	S	NA	0.0009	NA	NA	0.0009	-0.0179592	0
C5_1_S3	5	1	0	30	S	0.0026	0.0019	0.0046	0.0065	0.0091	0.019633	0.4
C5_4_S1	5	4	0	30	S	0.0045	0.0036	0.0096	0.0132	0.0177	0.0133944	0.340909
C5_4_S2	5	4	0	30	S	0.0027	0.0059	0.0082	0.0141	0.0168	0.0176552	0.191489
C5_4_S3	5	4	0	30	S	0.0065	0.0081	0.0258	0.0339	0.0404	0.0322188	0.19174
C2_1_J1	2	1	0	35	J	0.01	0.0181	0.0203	0.0384	0.0484	0.0242907	0.260417
C2_1_J2	2	1	0	35	J	0.0135	0.0188	0.0429	0.0617	0.0752	0.0259559	0.218801
C2_1_J3	2	1	0	35	J	0.0063	0.0116	0.0348	0.0464	0.0527	0.023193	0.135776
C2_4_J1	2	4	0	35	J	0.0076	0.0139	0.0184	0.0323	0.0399	0.016187	0.235294
C2_4_J2	2	4	0	35	J	0.0062	0.0066	0.0119	0.0185	0.0247	0.019304	0.335135
C2_4_J3	2	4	0	35	J	0.0084	0.0139	0.0184	0.0323	0.0407	0.0187812	0.260062
C4_1_J1	4	1	0	35	J	0.0121	0.0208	0.0553	0.0761	0.0882	0.0230282	0.159001
C4_1_J2	4	1	0	35	J	0.0057	0.013	0.0225	0.0355	0.0412	0.0134974	0.160563
C4_1_J3	4	1	0	35	J	0.007	0.0133	0.02	0.0333	0.0403	0.0189699	0.21021
C4_4_J1	4	4	0	35	J	0.0053	0.006	0.0151	0.0211	0.0264	0.0141907	0.251185
C4_4_J2	4	4	0	35	J	0.0021	0.0022	0.0045	0.0067	0.0088	-0.00378504	0.313433
C4_4_J3	4	4	0	35	J	0.011	0.0197	0.0306	0.0503	0.0613	0.024802	0.218688
C2_1_O1	2	1	0	35	O	0.0021	0.0015	0.0085	0.01	0.0121	0.0167654	0.21
C2_1_O2	2	1	0	35	O	0.003	0.0033	0.0073	0.0106	0.0136	0.0223468	0.283019
C2_1_O3	2	1	0	35	O	0.004	0.0042	0.0049	0.0091	0.0131	0.0191961	0.43956
C2_4_O1	2	4	0	35	O	0.0029	0.0066	0.0119	0.0185	0.0214	0.0188198	0.156757
C2_4_O2	2	4	0	35	O	0.0089	0.0103	0.026	0.0363	0.0452	0.0271156	0.245179
C2_4_O3	2	4	0	35	O	0.0064	0.0061	0.0228	0.0289	0.0353	0.0253297	0.221453
C4_1_O1	4	1	0	35	O	0.0019	0.0076	0.0154	0.023	0.0249	0.0159865	0.0826087
C4_1_O2	4	1	0	35	O	0.0027	0.0035	0.0075	0.011	0.0137	0.018866	0.245455
C4_1_O3	4	1	0	35	O	0.0051	0.0056	0.004	0.0096	0.0147	0.0204437	0.53125
C4_4_O1	4	4	0	35	O	0.006	0.0077	0.0125	0.0202	0.0262	0.0225934	0.29703
C4_4_O2	4	4	0	35	O	0.0019	0.0012	0.0019	0.0031	0.005	-0.00270307	0.612903
C4_4_O3	4	4	0	35	O	0.0045	0.0099	0.0088	0.0187	0.0232	0.0288266	0.240642
C2_1_S1	2	1	0	35	S	0.0027	0.0035	0.0088	0.0123	0.015	0.0228153	0.219512
C2_1_S2	2	1	0	35	S	0.0029	0.0049	0.0052	0.0101	0.013	0.0213524	0.287129
C2_1_S3	2	1	0	35	S	0.0053	0.0085	0.0089	0.0174	0.0227	0.0229712	0.304598
C2_4_S1	2	4	0	35	S	0.0035	0.0021	0.0071	0.0092	0.0127	0.00756073	0.380435
C2_4_S2	2	4	0	35	S	0.0043	0.005	0.0106	0.0156	0.0199	0.0170222	0.275641
C2_4_S3	2	4	0	35	S	0.0025	0.0036	0.0079	0.0115	0.014	0.0241867	0.217391
C4_1_S1	4	1	0	35	S	0.0014	0.0017	0.0037	0.0054	0.0068	0.00517787	0.259259
C4_1_S2	4	1	0	35	S	0.0039	0.0049	0.0093	0.0142	0.0181	0.0166717	0.274648
C4_1_S3	4	1	0	35	S	0.0052	0.0037	0.0051	0.0088	0.014	0.0248536	0.590909
C4_4_S1	4	4	0	35	S	0.0019	0.0028	0.0062	0.009	0.0109	0.0123619	0.211111
C4_4_S2	4	4	0	35	S	0.0039	0.0094	0.0079	0.0173	0.0212	0.0182266	0.225434
C4_4_S3	4	4	0	35	S	0.0041	0.0053	0.01	0.0153	0.0194	0.0244926	0.267974
C3_2_J1	3	2	8	25	J	0.0072	0.0069	0.005	0.0119	0.0191	0.0116326	0.605042
C3_2_J2	3	2	8	25	J	0.0082	0.0065	0.0094	0.0159	0.0241	0.0201247	0.515723
C3_2_J3	3	2	8	25	J	0.0158	0.012	0.0171	0.0291	0.0449	0.0136468	0.542955
C3_3_J1	3	3	8	25	J	0.0019	0.0027	0.0032	0.0059	0.0078	0.0153582	0.322034
C3_3_J2	3	3	8	25	J	0.0058	0.0091	0.022	0.0311	0.0369	0.015304	0.186495
C3_3_J3	3	3	8	25	J	0.0078	0.008	0.0198	0.0278	0.0356	0.0178583	0.280576
C6_2_J1	6	2	8	25	J	0.0068	0.007	0.0152	0.0222	0.029	0.0193085	0.306306
C6_2_J2	6	2	8	25	J	0.0119	0.0166	0.0316	0.0482	0.0601	0.0202149	0.246888
C6_2_J3	6	2	8	25	J	0.0097	0.0087	0.0146	0.0233	0.033	0.0209809	0.416309
C6_3_J1	6	3	8	25	J	0.0067	0.0114	0.0213	0.0327	0.0394	0.0198122	0.204893
C6_3_J2	6	3	8	25	J	0.0114	0.0189	0.0217	0.0406	0.052	0.019079	0.280788
C6_3_J3	6	3	8	25	J	0.0042	0.0112	0.0109	0.0221	0.0263	0.00896101	0.190045
C3_2_O1	3	2	8	25	O	0.0027	0.0064	0.008	0.0144	0.0171	0.00870422	0.1875
C3_2_O2	3	2	8	25	O	0.003	0.005	0.0092	0.0142	0.0172	0.0205804	0.211268
C3_2_O3	3	2	8	25	O	0.004	0.0043	0.006	0.0103	0.0143	0.0168104	0.38835
C3_3_O1	3	3	8	25	O	0.0049	0.0054	0.0158	0.0212	0.0261	0.0231934	0.231132
C3_3_O2	3	3	8	25	O	0.0072	0.0057	0.0198	0.0255	0.0327	0.0286397	0.282353
C3_3_O3	3	3	8	25	O	0.0037	0.0017	0.0065	0.0082	0.0119	0.0193323	0.45122
C6_2_O1	6	2	8	25	O	0.0009	0.0023	0.0037	0.006	0.0069	0.00619175	0.15
C6_2_O2	6	2	8	25	O	0.0038	0.0038	0.007	0.0108	0.0146	0.0253513	0.351852
C6_2_O3	6	2	8	25	O	0.0034	0.0044	0.0103	0.0147	0.0181	0.020542	0.231293
C6_3_O1	6	3	8	25	O	0.0047	0.0073	0.0174	0.0247	0.0294	0.0208965	0.190283
C6_3_O2	6	3	8	25	O	0.0032	0.0059	0.0104	0.0163	0.0195	0.0164489	0.196319
C6_3_O3	6	3	8	25	O	0.0029	0.0036	0.002	0.0056	0.0085	0.00659344	0.517857
C3_2_S1	3	2	8	25	S	0.0003	0.002	0.0014	0.0034	0.0037	-0.000150661	0.0882353
C3_2_S2	3	2	8	25	S	0.0027	0.0029	0.0097	0.0126	0.0153	0.0173686	0.214286
C3_2_S3	3	2	8	25	S	0.0019	0.0032	0.0021	0.0053	0.0072	0.0140178	0.358491
C3_3_S1	3	3	8	25	S	0.0039	0.003	0.0175	0.0205	0.0244	0.0235239	0.190244
C3_3_S2	3	3	8	25	S	0.0023	0.0009	0.0014	0.0023	0.0046	-0.000955892	1
C3_3_S3	3	3	8	25	S	NA	NA	NA	NA	0	NA	NA
C6_2_S1	6	2	8	25	S	0.0026	0.0038	0.0109	0.0147	0.0173	0.0127555	0.176871
C6_2_S2	6	2	8	25	S	0.003	0.0037	0.0042	0.0079	0.0109	NA	0.379747
C6_2_S3	6	2	8	25	S	0.0013	0.0018	0.0027	0.0045	0.0058	-0.000393149	0.288889
C6_3_S1	6	3	8	25	S	0.0046	0.0024	0.0194	0.0218	0.0264	0.0180054	0.211009
C6_3_S2	6	3	8	25	S	0.0034	0.0035	0.0061	0.0096	0.013	0.0163875	0.354167
C6_3_S3	6	3	8	25	S	0.0008	0.0012	0.0008	0.002	0.0028	-0.000730007	0.4
C1_2_J1	1	2	8	30	J	0.0051	0.0091	0.003	0.0121	0.0172	0.00520022	0.421488
C1_2_J2	1	2	8	30	J	0.008	0.0093	0.022	0.0313	0.0393	0.0155739	0.255591
C1_2_J3	1	2	8	30	J	0.0034	0.0052	0.0069	0.0121	0.0155	0.0114084	0.280992
C1_3_J1	1	3	8	30	J	0.0087	0.016	0.0192	0.0352	0.0439	0.0173135	0.247159
C1_3_J2	1	3	8	30	J	0.0113	0.0128	0.0329	0.0457	0.057	0.0193271	0.247265
C1_3_J3	1	3	8	30	J	0.0037	0.0039	0.0045	0.0084	0.0121	0.00586283	0.440476
C5_2_J1	5	2	8	30	J	0.0045	0.0075	0.011	0.0185	0.023	0.013279	0.243243
C5_2_J2	5	2	8	30	J	0.0057	0.0072	0.0051	0.0123	0.018	NA	0.463415
C5_2_J3	5	2	8	30	J	0.0058	0.0097	0.0148	0.0245	0.0303	0.00939527	0.236735
C5_3_J1	5	3	8	30	J	0.0067	0.0114	0.0112	0.0226	0.0293	0.0125259	0.29646
C5_3_J2	5	3	8	30	J	0.0104	0.0129	0.0157	0.0286	0.039	0.0205878	0.363636
C5_3_J3	5	3	8	30	J	0.0005	0.002	0.0011	0.0031	0.0036	-0.00319338	0.16129
C1_2_O1	1	2	8	30	O	0.0018	0.0031	0.0028	0.0059	0.0077	0.0117493	0.305085
C1_2_O2	1	2	8	30	O	0.0032	0.0035	0.0057	0.0092	0.0124	0.0126392	0.347826
C1_2_O3	1	2	8	30	O	0.0095	0.0059	0.0128	0.0187	0.0282	0.0279756	0.508021
C1_3_O1	1	3	8	30	O	0.0029	0.0033	0.0031	0.0064	0.0093	0.0178211	0.453125
C1_3_O2	1	3	8	30	O	0.0057	0.0036	0.0033	0.0069	0.0126	0.00954021	0.826087
C1_3_O3	1	3	8	30	O	0.0021	0.0025	0.004	0.0065	0.0086	0.0116697	0.323077
C5_2_O1	5	2	8	30	O	0.0074	0.0093	0.0096	0.0189	0.0263	0.0203613	0.391534
C5_2_O2	5	2	8	30	O	0.0067	0.0051	0.0137	0.0188	0.0255	0.0242546	0.356383
C5_2_O3	5	2	8	30	O	NA	0.0018	NA	NA	0.0018	0.00543395	0
C5_3_O1	5	3	8	30	O	0.0077	0.0104	0.0218	0.0322	0.0399	0.0262004	0.23913
C5_3_O2	5	3	8	30	O	0.0066	0.0093	0.0165	0.0258	0.0324	0.0211233	0.255814
C5_3_O3	5	3	8	30	O	0.003	0.0018	0.002	0.0038	0.0068	0.0035604	0.789474
C1_2_S1	1	2	8	30	S	0.0023	0.0019	0.0066	0.0085	0.0108	0.00965128	0.270588
C1_2_S2	1	2	8	30	S	0.0051	0.0061	0.0152	0.0213	0.0264	0.0272233	0.239437
C1_2_S3	1	2	8	30	S	0.0018	0.0027	0.003	0.0057	0.0075	0.0145484	0.315789
C1_3_S1	1	3	8	30	S	0.0027	0.0036	0.0126	0.0162	0.0189	0.0190752	0.166667
C1_3_S2	1	3	8	30	S	0.002	0.0033	0.0055	0.0088	0.0108	0.0177174	0.227273
C1_3_S3	1	3	8	30	S	0.0057	0.0054	0.0194	0.0248	0.0305	0.0338909	0.229839
C5_2_S1	5	2	8	30	S	NA	NA	NA	NA	0	NA	NA
C5_2_S2	5	2	8	30	S	0.0024	0.0041	0.0104	0.0145	0.0169	0.0217389	0.165517
C5_2_S3	5	2	8	30	S	0.0017	0.0008	0.0021	0.0029	0.0046	0.0101695	0.586207
C5_3_S1	5	3	8	30	S	0.0032	0.0023	0.0051	0.0074	0.0106	0.0180832	0.432432
C5_3_S2	5	3	8	30	S	0.0025	0.0032	0.0046	0.0078	0.0103	0.0215517	0.320513
C5_3_S3	5	3	8	30	S	0.002	0.0014	0.0031	0.0045	0.0065	0.00376756	0.444444
C2_2_J1	2	2	8	35	J	0.0037	0.0073	0.0056	0.0129	0.0166	0.00190411	0.286822
C2_2_J2	2	2	8	35	J	0.0062	0.0106	0.0384	0.049	0.0552	0.017129	0.126531
C2_2_J3	2	2	8	35	J	0.0054	0.0059	0.0168	0.0227	0.0281	0.0144924	0.237885
C2_3_J1	2	3	8	35	J	0.0059	0.0105	0.0073	0.0178	0.0237	0.00916551	0.331461
C2_3_J2	2	3	8	35	J	0.0026	0.0013	0.0036	0.0049	0.0075	0.00675825	0.530612
C2_3_J3	2	3	8	35	J	0.0092	0.0074	0.0293	0.0367	0.0459	0.0255498	0.250681
C4_2_J1	4	2	8	35	J	0.0024	0.0039	0.0038	0.0077	0.0101	0.00136803	0.311688
C4_2_J2	4	2	8	35	J	0.0073	0.0094	0.008	0.0174	0.0247	0.0135513	0.41954
C4_2_J3	4	2	8	35	J	0.0037	0.0042	0.0039	0.0081	0.0118	0.0115718	0.45679
C4_3_J1	4	3	8	35	J	0.0096	0.0136	0.0168	0.0304	0.04	0.0200901	0.315789
C4_3_J2	4	3	8	35	J	0.0046	0.0087	0.0066	0.0153	0.0199	0.00929125	0.300654
C4_3_J3	4	3	8	35	J	0.0094	0.0095	0.0292	0.0387	0.0481	0.0175775	0.242894
C2_2_O1	2	2	8	35	O	0.0021	0.0027	0.0029	0.0056	0.0077	0.00611713	0.375
C2_2_O2	2	2	8	35	O	0.005	0.0056	0.0051	0.0107	0.0157	0.012044	0.46729
C2_2_O3	2	2	8	35	O	NA	0.0018	0.0037	0.0055	0.0055	-0.000839945	0
C2_3_O1	2	3	8	35	O	0.0024	0.0028	0.0019	0.0047	0.0071	0.00637987	0.510638
C2_3_O2	2	3	8	35	O	0.0124	0.0036	0.018	0.0216	0.034	0.0206469	0.574074
C2_3_O3	2	3	8	35	O	0.0009	0.0018	0.0026	0.0044	0.0053	0.00894962	0.204545
C4_2_O1	4	2	8	35	O	0.006	0.0067	0.0055	0.0122	0.0182	0.0192307	0.491803
C4_2_O2	4	2	8	35	O	0.0015	0.0043	0.0059	0.0102	0.0117	0.012222	0.147059
C4_2_O3	4	2	8	35	O	0.0029	0.0052	0.0027	0.0079	0.0108	0.0137813	0.367089
C4_3_O1	4	3	8	35	O	0.0043	0.0037	0.0043	0.008	0.0123	0.0086745	0.5375
C4_3_O2	4	3	8	35	O	0.0041	0.0034	0.008	0.0114	0.0155	0.0128974	0.359649
C4_3_O3	4	3	8	35	O	0.0018	0.0045	0.0111	0.0156	0.0174	0.0210027	0.115385
C2_2_S1	2	2	8	35	S	0.0029	0.0012	0.0056	0.0068	0.0097	0.0122223	0.426471
C2_2_S2	2	2	8	35	S	0.0008	0.0115	0.0009	0.0124	0.0132	0.00426178	0.0645161
C2_2_S3	2	2	8	35	S	0.0022	0.0072	0.002	0.0092	0.0114	0.0149004	0.23913
C2_3_S1	2	3	8	35	S	0.002	0.0046	0.0115	0.0161	0.0181	0.0161251	0.124224
C2_3_S2	2	3	8	35	S	0.0021	0.0083	0.0234	0.0317	0.0338	0.00316401	0.0662461
C2_3_S3	2	3	8	35	S	0.0019	0.0077	0.0092	0.0169	0.0188	0.0171904	0.112426
C4_2_S1	4	2	8	35	S	0.0008	0.0026	0.0038	0.0064	0.0072	0.00971927	0.125
C4_2_S2	4	2	8	35	S	0.0014	0.0019	0.0036	0.0055	0.0069	0.0317934	0.254545
C4_2_S3	4	2	8	35	S	0.0025	0.003	0.0086	0.0116	0.0141	0.0110766	0.215517
C4_3_S1	4	3	8	35	S	0.0006	0.0014	0.0015	0.0029	0.0035	0.00821581	0.206897
C4_3_S2	4	3	8	35	S	0.0011	0.0014	0.0033	0.0047	0.0058	0.0086217	0.234043
C4_3_S3	4	3	8	35	S	0.0018	0.0028	0.0025	0.0053	0.0071	0.0120368	0.339623

## Sheet: set upExp2
a
		Big yellow container 1	>	aquarium 1	>	Exp. Plant Unit 1	>	St Jacut
		Big yellow container 2		aquarium 2		Exp. Plant Unit 2	>	St Jacut
		Big yellow container 3		aquarium 3		Exp. Plant Unit 3	>	St Jacut
		Big yellow container 4		aquarium 4		Exp. Plant Unit 4	>	Oosterschelde
		Big yellow container 5				Exp. Plant Unit 5	>	Oosterschelde
		Big yellow container 6				Exp. Plant Unit 6	>	Oosterschelde
						Exp. Plant Unit 7	>	Sylt
						Exp. Plant Unit 8	>	Sylt
						Exp. Plant Unit 9	>	Sylt
